# Supplementary material
Source: PubMed Central journal article supplement (PMC2859506)
Supplement: supp_M110.108837_jbc.M110.108837-2.pdf [file supp_M110.108837_jbc.M110.108837-2.pdf]

## Supplemental Data

### Figure S1: SP-D binds eluate containing ovomucin and ovomacroglobulin, but not purified OVA.

- A.** SP-D binds early eluting fractions of the separation of OVA preparations. OVA (500  $\mu$ g, grade III) was separated on a Superose 6 size exclusion column (—,  $A_{280}$  nm). Fractions from the separation (samples from every 0.5 ml of eluate) were coated on ELISA plates and SP-D binding in the presence of calcium (5 mM) was tested. SP-D binds (●,  $A_{450}$  nm) well to early eluting fractions containing high molecular weight proteins (under line 1) but not to the fractions containing purified OVA (under line 2).
- B.** High molecular weight proteins present in the in the first peaks are identified as ovomucin (OMu, 234 kDa) and ovomacroglobulin (OM, 166 kDa) by mass spectrometry (MS; MALDI-ToF). Later eluting proteins are identified as ovotransferrin (OT; 76 kDa) and ovalbumin (OVA, 43 kDa). Samples for gel 1 and gel 2 were taken from the peaks highlighted under the line 1 and line 2 of panel A, respectively.
- C.** A fraction of OVA from the Superose 6 purification (panel A, 15.8 ml) was further purified on a MonoQ ion exchange column. Coomassie blue stained SDS-PAGE gel shows BSA (lane 1), original OVA (lane 2) and the highly purified OVA (lane 3).
- D.** ELISA-style binding assay shows that SP-D does not bind purified OVA shown in panel C, lane 3. SP-D binds well to partially purified OVA and mannan compared to both BSA and pure OVA (\* $p < 0.01$ ). These results (Fig. S1) are representative of one of the four experiments.
