# Supplementary material
Source: PubMed Central journal article supplement (PMC2859506)

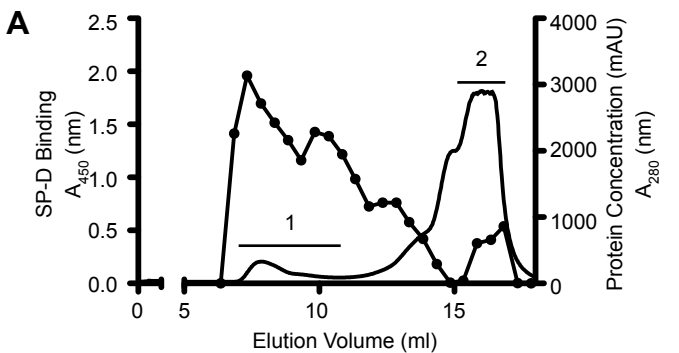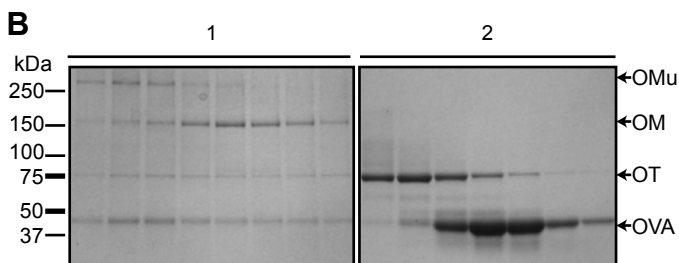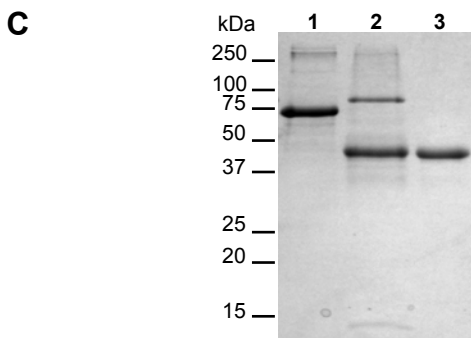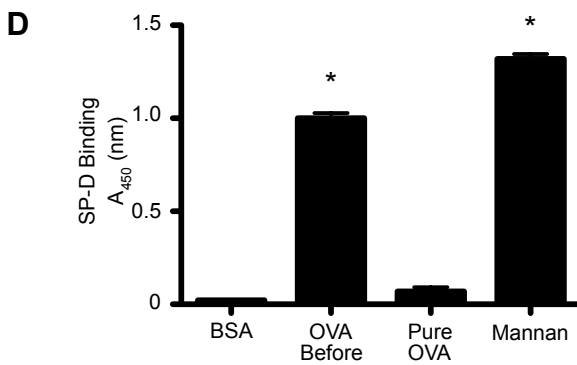

Supplemental Figure 1

Supplement: supp_M110.108837_jbc.M110.108837-1.pdf [file supp_M110.108837_jbc.M110.108837-1.pdf]
